# Supplementary material for: Association between family history, early growth and the risk of beta cell autoimmunity in children at risk for type 1 diabetes
Source: PubMed Central journal article supplement (PMC7716821; doi:10.1007/s00125-020-05287-1), 2020-10-07
Supplement: 125_2020_5287_MOESM1_ESM.pdf [file 125_2020_5287_MOESM1_ESM.pdf]

Electronic supplementary material

ESM Table 1: *General Linear Regression Models Predicting Height Velocity (cm/yr and z-score)*

*by Family History of type 1 diabetes (mother vs father vs sibling; n=1772)*

| Parameters                                            | Univariate Models |      |        | Multivariate Model <sup>c</sup> |                |                |
|-------------------------------------------------------|-------------------|------|--------|---------------------------------|----------------|----------------|
|                                                       |                   |      |        | $\beta$                         | SE ( $\beta$ ) | <i>p</i> value |
| <b>Model 1 (cm/yr)</b>                                |                   |      |        |                                 |                |                |
| Family history from mother                            | 0.30              | 0.14 | 0.038  | -0.54                           | 0.15           | <0.001         |
| Family history from father                            | 0.10              | 0.14 | 0.464  | -0.14                           | 0.14           | 0.327          |
| Gestational age (weeks)                               | -0.11             | 0.03 | <0.001 | -0.06                           | 0.03           | 0.069          |
| Northern European <sup>a</sup>                        | 0.56              | 0.11 | <0.001 | 0.31                            | 0.10           | 0.002          |
| Central Europe I <sup>a</sup>                         | 0.26              | 0.14 | 0.064  | 0.47                            | 0.13           | <0.001         |
| Male                                                  | 0.23              | 0.09 | 0.012  | 0.39                            | 0.08           | <0.001         |
| Vaginal delivery                                      | 0.10              | 0.09 | 0.260  | 0.18                            | .009           | 0.045          |
| First diet other infant formula <sup>b</sup>          | -5.55             | 1.93 | 0.004  | -3.70                           | 1.70           | 0.029          |
| Birth weight (kg)                                     | -0.56             | 0.08 | <0.001 | 0.59                            | 0.10           | <0.001         |
| Birth length (cm)                                     | -0.32             | 0.02 | <0.001 | -0.38                           | 0.02           | <0.001         |
| Duration of breast feeding                            | -0.04             | 0.02 | 0.117  | -0.05                           | 0.02           | 0.013          |
| Treatment group assignment casein hydrolysate formula | 0.03              | 0.09 | 0.773  | -0.01                           | 0.08           | 0.900          |
| Birth order                                           | -0.12             | 0.05 | 0.012  | -0.13                           | 0.05           | 0.004          |

| <b>Model 2 (z-score)</b>                              |       |       |        |       |      |        |
|-------------------------------------------------------|-------|-------|--------|-------|------|--------|
| Family history from mother                            | 0.07  | 0.04  | 0.136  | -0.16 | 0.04 | <0.001 |
| Family history from father                            | 0.12  | 0.05  | 0.014  | -0.04 | 0.04 | 0.362  |
| Gestational age (weeks)                               | -0.05 | 0.01  | <0.001 | -0.02 | 0.01 | 0.070  |
| Northern Europe <sup>a</sup>                          | 0.17  | 0.04  | <0.001 | 0.09  | 0.03 | 0.001  |
| Central Europe II <sup>a</sup>                        | 0.005 | 0.05  | 0.930  | 0.07  | 0.04 | 0.124  |
| Central Europe I <sup>a</sup>                         | 0.07  | 0.05  | 0.147  | 0.16  | 0.04 | <0.001 |
| Vaginal delivery                                      | 0.02  | 0.03  | 0.519  | 0.05  | 0.03 | 0.072  |
| First diet other infant formula                       | -1.73 | 0.62  | 0.006  | -1.03 | 0.49 | 0.035  |
| Birth weight (kg)                                     | -0.31 | 0.03  | <0.001 | 0.17  | 0.03 | <0.001 |
| Birth length (cm)                                     | -0.14 | 0.004 | <0.001 | -0.16 | 0.01 | <0.001 |
| Duration of breast feeding                            | -0.01 | 0.007 | 0.143  | -0.02 | 0.01 | 0.010  |
| Treatment group assignment casein hydrosylate formula | 0.01  | 0.03  | 0.790  | -0.01 | 0.02 | 0.726  |
| Birth order                                           | -0.05 | 0.015 | 0.001  | -0.04 | 0.01 | 0.002  |

<sup>a</sup> Region were defined as Northern Europe (Finland, Sweden), Central Europe I (Czech Republic, Estonia, Hungary, Poland), Central Europe II (Germany, Luxembourg, The Netherlands, Switzerland), Southern Europe (Italy, Spain), USA, Canada or Australia

<sup>b</sup> First diet defined as breast milk, study formula, Nutramigen, other infant formula or other milk, or a combination of these (2 types of milk) received within the first 3 days of life

<sup>c</sup> Intercepts [ $\beta$  (SE ( $\beta$ ),  $P$  value)] - Model 1 = 38.29 (1.37, <0.001), Model 2 = 8.15 (0.40, <0.001)

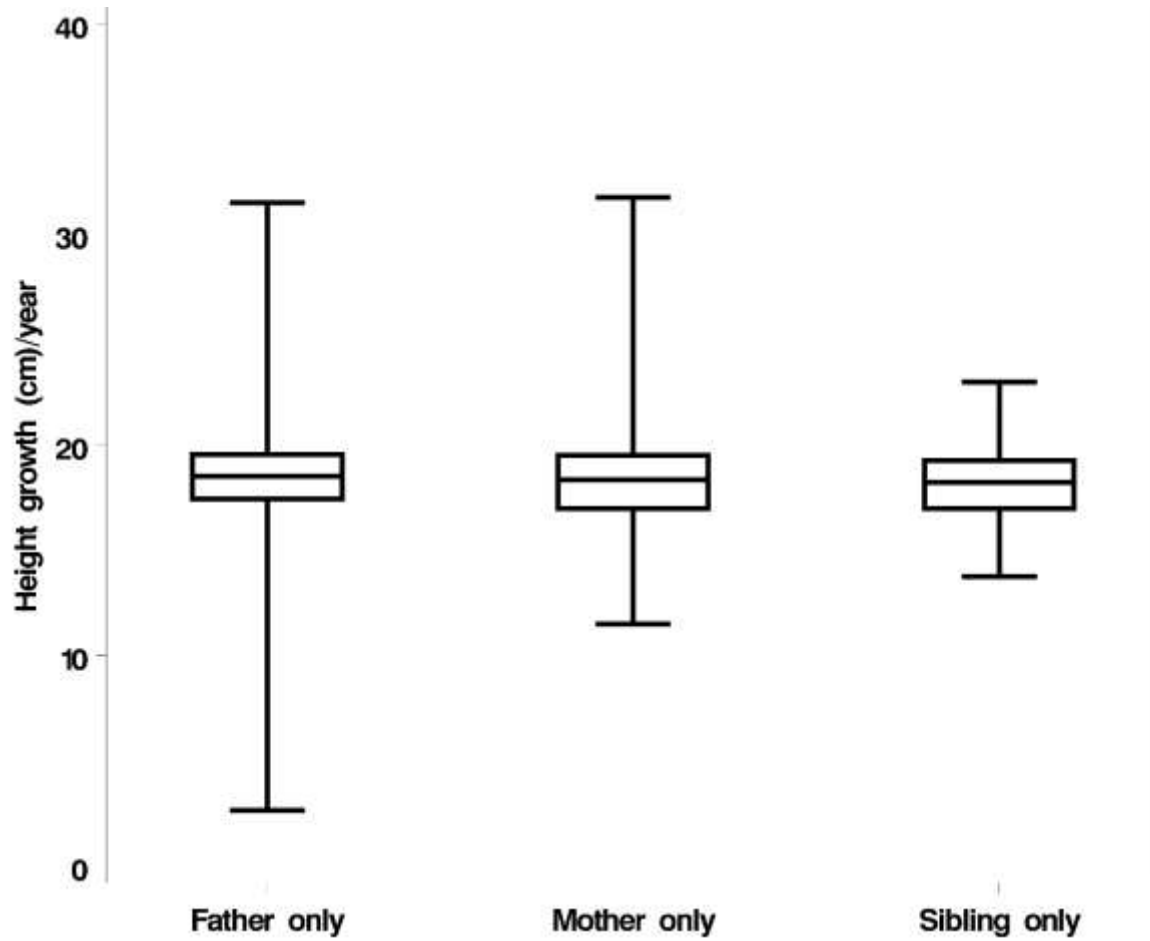

**ESM Figure 1** – Difference in BMI (z-score) at 2 years of age by family history [mother (n=877) vs father (n=645) vs sibling (n=250)] ( $p = 0.054$ )

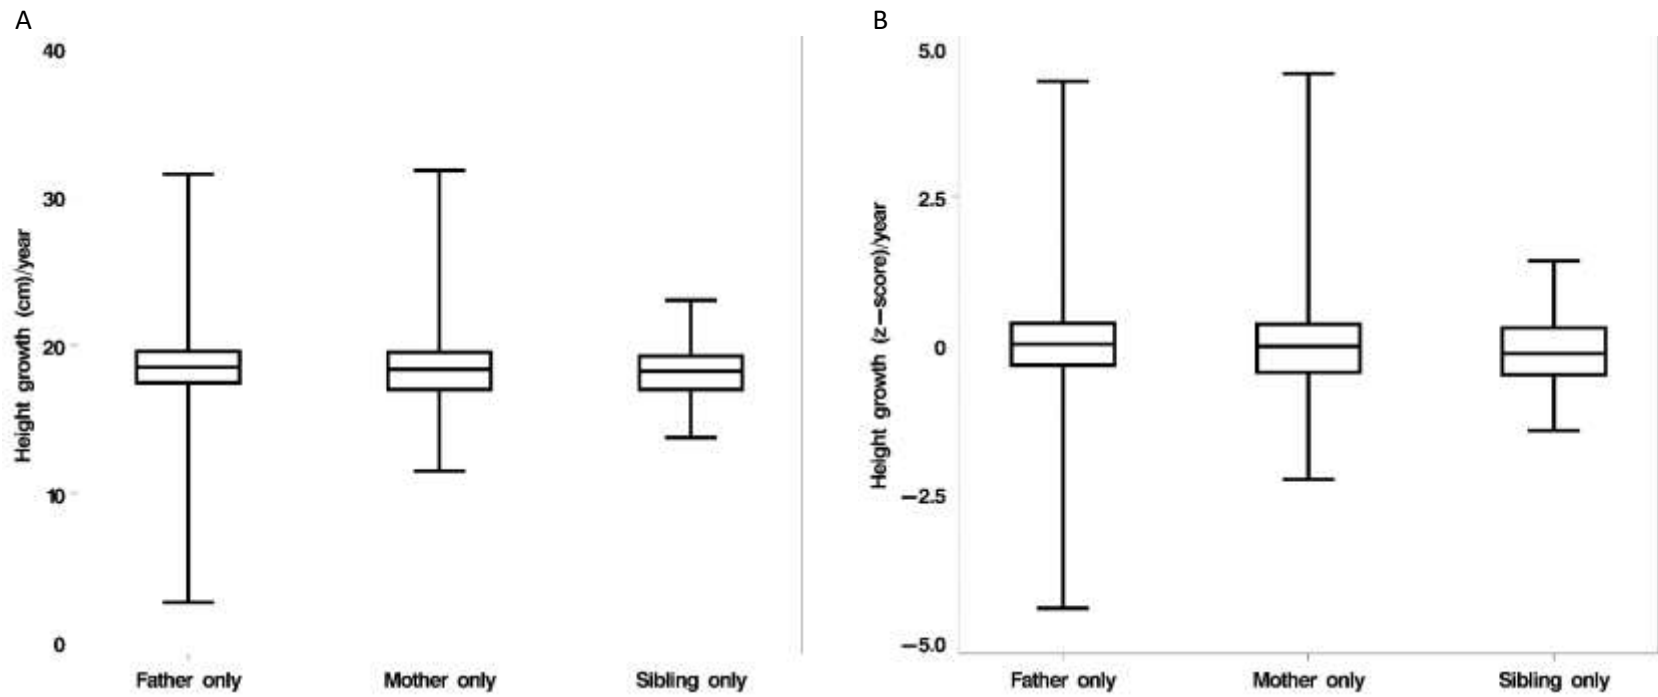

**ESM Figure 2** – Difference in height velocity during the first 2 years of life by family history [mother (n=877) vs father (n=645) vs sibling (n=250)]. a) velocity in cm/yr, ( $p = 0.053$ ) b) velocity as z-score/yr ( $p = 0.041$ )

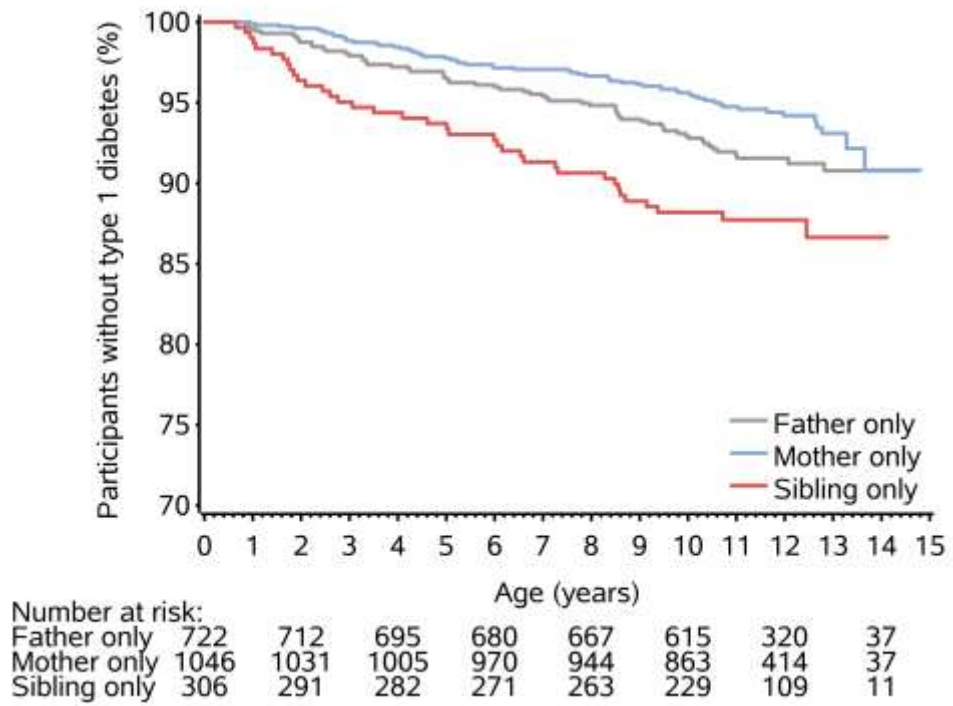

**ESM Figure 3** – Time to type 1 diabetes by family history (mother vs father vs sibling), (Log-Rank Chi-Square 17.2;  $p < 0.001$ )

## LIST OF TRIGR INVESTIGATORS FOR PUBLICATIONS / version September 2020

| <u>Administration/<br/>Country</u>                                                        | <u>Study center</u> | <u>Last name</u>     | <u>First name</u> | <u>Position</u>                                                                 |
|-------------------------------------------------------------------------------------------|---------------------|----------------------|-------------------|---------------------------------------------------------------------------------|
| <b>Data Safety Monitoring Board</b>                                                       |                     | Mandrup-Poulsen,     | Thomas            | Chair University of Copenhagen, Copenhagen, Denmark                             |
|                                                                                           |                     | Arjas                | Elias             | Member, University of Helsinki, Helsinki, Finland                               |
|                                                                                           |                     | Läärä                | Esa               | Member, University of Oulu, Oulu, Finland                                       |
|                                                                                           |                     | Lernmark             | Åke               | Member, University of Lund, Malmö, Sweden                                       |
|                                                                                           |                     | Schmidt              | Barbara           | Member, University of Pennsylvania, Philadelphia, PA, USA                       |
|                                                                                           |                     | Krischer             | Jeffrey P.        | Observer, University of South Florida. Tampa FL, USA                            |
| <b>International Coordinating Center (ICC), University of Helsinki, Helsinki, Finland</b> |                     | Åkerblom             | Hans K. † *       | PI of the Study until 30.6.08, Deputy PI from 1.7.2008                          |
|                                                                                           |                     | Hyytinen             | Mila              | European Study Monitor                                                          |
|                                                                                           |                     | Knip                 | Mikael            | Deputy PI until 30.6.2008, PI of the Study from 1.7.2008, National Investigator |
|                                                                                           |                     | Koski                | Katriina          | European Study Monitor                                                          |
|                                                                                           |                     | Koski                | Matti             | IT Specialist                                                                   |
|                                                                                           |                     | Pajakkala<br>Salonen | Eeva<br>Marja     | European Study Monitor<br>Study Coordinator                                     |
| <b>Data Management Unit (DMU), University of South Florida, Tampa, Florida, USA</b>       |                     | Cuthbertson          | David             | Biostatistician                                                                 |
|                                                                                           |                     | Krischer             | Jeffrey P.        | PI of the DMU                                                                   |
|                                                                                           |                     | Shanker              | Linda             | Coordinator                                                                     |

| <u>Administration/<br/>Country</u>                                                                              | <u>Study center</u>                                                                                                           | <u>Last name</u> | <u>First name</u>   | <u>Position</u>                                                                                     |                                                                                            |
|-----------------------------------------------------------------------------------------------------------------|-------------------------------------------------------------------------------------------------------------------------------|------------------|---------------------|-----------------------------------------------------------------------------------------------------|--------------------------------------------------------------------------------------------|
| Canadian Coordinating<br>Center, University of Western<br>Ontario, London, and<br>University of Ottawa, Ontario |                                                                                                                               | Bradley          | Brenda              | National Coordinator                                                                                |                                                                                            |
|                                                                                                                 |                                                                                                                               | Dosch            | Hans-Michael        | Co-Investigator for<br>Canada                                                                       |                                                                                            |
|                                                                                                                 |                                                                                                                               | Dupré            | John                | Co-PI for North America<br>and<br>National Investigator until<br>08/12/2015,<br>Executive Committee |                                                                                            |
|                                                                                                                 |                                                                                                                               | Fraser           | William             | Co-Investigator for<br>Canada<br>Executive Committee                                                |                                                                                            |
|                                                                                                                 |                                                                                                                               | Lawson           | Margaret            | Co-Investigator for<br>Canada<br>Executive Committee                                                |                                                                                            |
|                                                                                                                 |                                                                                                                               | Mahon            | Jeffrey L.          | Co-PI for North America<br>and<br>National Investigator<br>after 08/12/2015,<br>Executive Committee |                                                                                            |
|                                                                                                                 |                                                                                                                               | Sermer           | Mathew              | Co-Investigator for<br>Canada,<br>Executive Committee                                               |                                                                                            |
|                                                                                                                 |                                                                                                                               | Taback           | Shayne P.           | Co-Investigator for<br>Canada,<br>Executive Committee                                               |                                                                                            |
|                                                                                                                 | USA Coordinating Center,<br>University of Pittsburgh,<br>Pennsylvania and University<br>of Washington, Seattle,<br>Washington |                  | Becker              | Dorothy                                                                                             | Co-PI for North America,<br>National Investigator,<br>Executive Committee                  |
|                                                                                                                 |                                                                                                                               |                  | Franciscus<br>Nucci | Margaret<br>Anita                                                                                   | National Coordinator<br>National Coordinator,<br>Nutrition Coordinator of<br>North America |
|                                                                                                                 |                                                                                                                               | Palmer           | Jerry               | Executive Committee                                                                                 |                                                                                            |

| <b><u>Administration/<br/>Country</u></b>                                                          | <b><u>Study center</u></b>                                                                            | <b><u>Last name</u></b>                 | <b><u>First name</u></b>               | <b><u>Position</u></b>                                                                                 |
|----------------------------------------------------------------------------------------------------|-------------------------------------------------------------------------------------------------------|-----------------------------------------|----------------------------------------|--------------------------------------------------------------------------------------------------------|
| <b>Nutritional Epidemiology Unit, National Institute for Health and Welfare, Helsinki, Finland</b> |                                                                                                       | Virtanen                                | Suvi M.                                | Head of Nutritional Epidemiology Unit                                                                  |
| <b>Australia</b>                                                                                   | <b>AUS01 – Westmead, New South Wales - Children’s Hospital</b>                                        | Catteau<br>Howard                       | Jacki<br>Neville                       | National Coordinator<br>National Investigator                                                          |
|                                                                                                    | <b>AUS02 – Newcastle, New South Wales - John Hunter Children’s Hospital</b>                           | Crock                                   | Patricia                               | Local Investigator                                                                                     |
|                                                                                                    | <b>AUS03 – Sydney, New South Wales - Sydney Children’s Hospital</b>                                   | Craig                                   | Maria                                  | Local Investigator                                                                                     |
| <b>Canada</b>                                                                                      | <b>CAN01 – London, Ontario - St. Joseph’s Health Care Centre</b>                                      | Clarson<br>Bere                         | Cheril L.<br>Lynda                     | Local Investigator<br>Coordinator                                                                      |
|                                                                                                    | <b>CAN02 – Vancouver, British Columbia - Children's and Women's Health Centre of British Columbia</b> | Thompson<br>Metzger<br>Marshall<br>Kwan | David<br>Daniel<br>Colleen<br>Jennifer | Local Investigator<br>Local Investigator<br>Coordinator (In Transition)<br>Coordinator (In Transition) |
|                                                                                                    | <b>CAN03 – Calgary, Alberta - Alberta Children's Hospital</b>                                         | Stephure<br>Pacaud<br>Schwarz           | David K.<br>Daniele<br>Wendy           | Local Investigator<br>Co-Investigator<br>Coordinator                                                   |



| <b><u>Administration/<br/>Country</u></b> | <b><u>Study center</u></b>                                                                      | <b><u>Last name</u></b>       | <b><u>First name</u></b>     | <b><u>Position</u></b>                               |
|-------------------------------------------|-------------------------------------------------------------------------------------------------|-------------------------------|------------------------------|------------------------------------------------------|
| Canada                                    | <b>CAN04 – Edmonton, Alberta - Walter MacKenzie Health Sciences</b>                             | Girgis<br>Thompson            | Rose<br>Marilyn              | Local Investigator<br>Coordinator                    |
|                                           | <b>CAN05 – Winnipeg, Manitoba - Health Sciences Centre</b>                                      | Taback<br>Catte               | Shayne P<br>Daniel           | Local Investigator<br>Coordinator                    |
|                                           | <b>CAN06 – Ottawa, Ontario - Children's Hospital of Eastern Ontario and The Ottawa Hospital</b> | Lawson<br>Bradley             | Margaret L<br>Brenda         | Local Investigator<br>Coordinator                    |
|                                           | <b>CAN07 – Toronto, Ontario - Mount Sinai Hospital/Hospital for Sick Children</b>               | Daneman<br>Sermer<br>Martin   | Denis<br>Mathew<br>Mary-Jean | Local Investigator<br>Co-Investigator<br>Coordinator |
|                                           | <b>CAN08 – Quebec, Quebec - CHUQ</b>                                                            | Morin<br>Frenette<br>Ferland  | Valérie<br>Line<br>Suzanne   | Local Investigator<br>Co-Investigator<br>Coordinator |
|                                           | <b>CAN09 - Saint John, New Brunswick – Regional Hospital</b>                                    | Sanderson<br>Heath            | Susan<br>Kathy               | Local Investigator<br>Coordinator                    |
|                                           | <b>CAN10 – Montreal, Quebec - L' Hôpital Sainte-Justine</b>                                     | Huot<br>Gonthier<br>Thibeault | Céline                       | Local Investigator<br>Co-Investigator<br>Coordinator |
|                                           | <b>CAN11 – Montreal, Quebec - Children's Hospital</b>                                           | Legault<br>Laforte            | Laurent<br>Diane             | Local Investigator<br>Coordinator                    |

| <u>Administration/<br/>Country</u>                                                    | <u>Study center</u>                                                                  | <u>Last name</u> | <u>First name</u>                 | <u>Position</u>                      |
|---------------------------------------------------------------------------------------|--------------------------------------------------------------------------------------|------------------|-----------------------------------|--------------------------------------|
| Canada                                                                                | CAN13 - St. John's,<br>Newfoundland and<br>Labrador - Janeway Child<br>Health Center | Bridger          | Tracey                            | Local Investigator<br>Coordinator    |
|                                                                                       |                                                                                      | Crummell         | Cheryl                            |                                      |
|                                                                                       | CAN14 – Kingston,<br>Ontario - Kingston<br>General Hospital/ Queen's<br>University   | Houlden          | Robyn                             | Local Investigator<br>Coordinator    |
|                                                                                       |                                                                                      | Breen            | Adriana                           |                                      |
|                                                                                       | CAN15 – Regina,<br>Saskatchewan - Regina<br>Qu'Appelle                               | Carson           | George                            | Local Investigator<br>Coordinator    |
|                                                                                       |                                                                                      | Kelly            | Sheila                            |                                      |
| CAN16 – Saskatoon,<br>Saskatchewan - Royal<br>University Hospital                     | Sankaran                                                                             | Koravangattu     | Local Investigator<br>Coordinator |                                      |
| Penner                                                                                | Marie                                                                                |                  |                                   |                                      |
| CAN17 – Peterborough,<br>Ontario - Peterborough<br>Regional Health Centre             | White                                                                                | Richard A        | Local Investigator<br>Coordinator |                                      |
| King                                                                                  | Nancy                                                                                |                  |                                   |                                      |
| CAN18 – Victoria, British<br>Columbia - Vancouver<br>Island Health Research<br>Centre | Popkin                                                                               | James            | Local Investigator<br>Coordinator |                                      |
|                                                                                       | Robson                                                                               | Laurie           |                                   |                                      |
| Czech Republic                                                                        | CZE01 - Prague - Faculty<br>Hospital Kralovske<br>Vinohrady                          | Al Taji          | Eva                               | National<br>Investigator/Coordinator |
|                                                                                       |                                                                                      | Mendlova         | Pavla                             | National Coordinator                 |
|                                                                                       |                                                                                      | Romanova         | Martina                           | Co-Investigator                      |
|                                                                                       |                                                                                      | Vavrinec         | Jan † *                           | National Investigator                |
|                                                                                       |                                                                                      | Vosahlo          | Jan                               | Co-Investigator                      |

| <b><u>Administration/<br/>Country</u></b>                   | <b><u>Study center</u></b>                                  | <b><u>Last name</u></b>                              | <b><u>First name</u></b> | <b><u>Position</u></b>                   |
|-------------------------------------------------------------|-------------------------------------------------------------|------------------------------------------------------|--------------------------|------------------------------------------|
| <b>Czech Republic</b>                                       | <b>CZE02 - Brno - Hospital Milosrdnych Bratri</b>           | Brazdova                                             | Ludmila                  | Local Investigator                       |
|                                                             | <b>CZE03- Olomouc - Faculty Hospital Olomouc</b>            | Venhacova<br>Venhacova                               | Jitrenka<br>Petra        | Local Investigator<br>Co-Investigator    |
|                                                             | <b>CZE04 - Usti nad Labem - Hospital of Masryk</b>          | Cipra                                                | Adam                     | Local Investigator                       |
|                                                             | <b>CZE05 - Ceske Budejovice - Hospital Ceske Budejovice</b> | Tomsikova                                            | Zdenka                   | Local Investigator                       |
|                                                             | <b>CZE06 - Plzen - Faculty Hospital Plzen</b>               | Paterová                                             | Petra                    | Local Investigator                       |
|                                                             | <b>CZE07 - Zlin - Hospital of Bata</b>                      | Gogelova                                             | Pavla                    | Local Investigator                       |
|                                                             | <b>Estonia</b>                                              | <b>EST01 - Tallinn - Tallinn Children's Hospital</b> | Einberg<br>Riikjärv      | Ülle<br>Mall-Anne                        |
| <b>EST02 - Tartu - Tartu University Children's Hospital</b> |                                                             | Ormisson<br>Tillmann                                 | Anne<br>Vallo            | National Investigator<br>Co-Investigator |

| <u>Administration/<br/>Country</u>                                               | <u>Study center</u>                                                                         | <u>Last name</u> | <u>First name</u>  | <u>Position</u>      |
|----------------------------------------------------------------------------------|---------------------------------------------------------------------------------------------|------------------|--------------------|----------------------|
| Finland                                                                          | FIN01 - Helsinki –<br>Children’s Hospital,<br>University of Helsinki                        | Johansson        | Susanne            | National Coordinator |
|                                                                                  |                                                                                             | Kleemola         | Päivi              | National Coordinator |
|                                                                                  |                                                                                             | Parkkola         | Anna               | Local Investigator   |
|                                                                                  | FIN02 - Helsinki -<br>Department of Obstetrics<br>and Gynecology,<br>University of Helsinki | Järvenpää        | Anna-Liisa         | Local Investigator   |
|                                                                                  | FIN03 - Espoo - Jorvi<br>Hospital                                                           | Hämäläinen       | Anu-Maaria         | Local Investigator   |
|                                                                                  |                                                                                             | Kiiveri          | Sanne              | Local Investigator   |
|                                                                                  | FIN04 - Kotka -<br>Kymenlaakso Central<br>Hospital                                          | Salonen          | Maria              | Local Investigator   |
|                                                                                  |                                                                                             | Tenhola          | Sirpa              | Local Investigator   |
|                                                                                  | FIN05 - Lahti - Paijat-<br>Hame Central Hospital                                            | Salonen          | Pia                | Local Investigator   |
| FIN06 - Tampere -<br>Department of Pediatrics,<br>Tampere University<br>Hospital | Jason                                                                                       | Eeva             | Local Investigator |                      |
|                                                                                  | Selvenius                                                                                   | Jenni            | Local Investigator |                      |
|                                                                                  | Siljander                                                                                   | Heli             | Co-Investigator    |                      |
| FIN07 - Pori - Satakunta<br>Central Hospital                                     | Ylitalo                                                                                     | Samuli           | Local Investigator |                      |
| FIN08 - Jyväskylä - Central<br>Finland Central Hospital                          | Paajanen                                                                                    | Ilkka            | Local Investigator |                      |
| FIN09 - Seinäjoki - South<br>Ostrobotnia Central<br>Hospital                     | Talvitie                                                                                    | Timo             | Local Investigator |                      |

| <u>Administration/<br/>Country</u> | <u>Study center</u>                                                                      | <u>Last name</u>      | <u>First name</u> | <u>Position</u>                       |
|------------------------------------|------------------------------------------------------------------------------------------|-----------------------|-------------------|---------------------------------------|
|                                    | <b>FIN10 - Hyvinkää -<br/>Hyvinkää Hospital</b>                                          | Lindström             | Kaija             | Local Investigator                    |
|                                    | <b>FIN11 - Kuopio -<br/>Department of Pediatrics,<br/>Kuopio University<br/>Hospital</b> | Huopio<br>Pesola      | Hanna<br>Jouni    | Local investigator<br>Co-Investigator |
|                                    | <b>FIN12 - Oulu - Department<br/>of Pediatrics, Oulu<br/>University Hospital</b>         | Veijola<br>Tapanainen | Riitta<br>Päivi   | Local Investigator<br>Co-Investigator |
|                                    | <b>FIN13 - Hämeenlinna -<br/>Kanta-Häme Central<br/>Hospital</b>                         | Alar                  | Abram             | Local Investigator                    |
|                                    | <b>FIN14 - Vaasa - Vaasa<br/>Central Hospital</b>                                        | Popov                 | Erik              | Local Investigator                    |
|                                    | <b>FIN15 - Lappeenranta -<br/>South Carelian Central<br/>Hospital</b>                    | Virransalo            | Ritva             | Local Investigator                    |
|                                    | <b>FIN16 - Mikkeli - Mikkeli<br/>Central Hospital</b>                                    | Nykänen               | Päivi             | Local Investigator                    |

| <b><u>Administration/<br/>Country</u></b> | <b><u>Study center</u></b>                                                         | <b><u>Last name</u></b>  | <b><u>First name</u></b> | <b><u>Position</u></b>                        |
|-------------------------------------------|------------------------------------------------------------------------------------|--------------------------|--------------------------|-----------------------------------------------|
| <b>Germany</b>                            | <b>GER01 - Hannover -<br/>Kinder- und<br/>Jugendkrankenhaus – Auf<br/>der Bult</b> | Aschemeier               | Bärbel                   | National Coordinator                          |
|                                           |                                                                                    | Danne                    | Thomas                   | National Investigator                         |
|                                           |                                                                                    | Kordonouri               | Olga                     | Co-Investigator                               |
| <b>Hungary</b>                            | <b>HUN01 - Budapest -<br/>Semmelweis Medical<br/>University</b>                    | Krikovszky<br>Madácsy    | Dóra<br>László           | Co-Investigator<br>National Investigator      |
| <b>Italy</b>                              | <b>ITA01 - Rome - University<br/>Campus Bio-Medico of<br/>Rome</b>                 | Khazrai                  | Yeganeh Manon            | Local Coordinator                             |
|                                           |                                                                                    | Maddaloni                | Ernesto                  | Local Coordinator                             |
|                                           |                                                                                    | Pozzilli                 | Paolo                    | National Investigator                         |
|                                           | <b>SAR01 - Cagliari - St.<br/>Michele Hospital</b>                                 | Mannu<br>Songini         | Carla<br>Marco           | Local Coordinator<br>National Investigator    |
| <b>Luxembourg</b>                         | <b>LUX01 - Luxembourg -<br/>Centre Hospitalier de<br/>Luxembourg</b>               | de Beaufort<br>Schierloh | Carine<br>Ulrike         | National Investigator<br>Co-Investigator      |
| <b>The Netherlands</b>                    | <b>NET01 - Rotterdam -<br/>Sophia Children's Hospital</b>                          | Bruining<br>Bisschoff    | Jan † *<br>Margriet      | National Investigator<br>National Coordinator |
| <b>Poland</b>                             | <b>POL01 - Wroclaw -<br/>Medical University of<br/>Wroclaw</b>                     | Basiak<br>Wasikowa       | Aleksander<br>Renata     | Co-Investigator<br>National Investigator      |
|                                           | <b>POL02 - Krakow - Polish-<br/>American Children's<br/>Hospital</b>               | Ciechanowska             | Marta                    | Local Investigator                            |

| <u>Administration/<br/>Country</u>                                      | <u>Study center</u>                                                                         | <u>Last name</u>                 | <u>First name</u>                    | <u>Position</u>       |
|-------------------------------------------------------------------------|---------------------------------------------------------------------------------------------|----------------------------------|--------------------------------------|-----------------------|
| Poland                                                                  | POL03 - Katowice -<br>Medical University of<br>Silesia                                      | Deja                             | Grazyna                              | Co-Investigator       |
|                                                                         |                                                                                             | Jarosz-Chobot                    | Przemyslaw                           | Local Investigator    |
|                                                                         | POL04 - Lodz - Medical<br>University of Lodz                                                | Szadkowska                       | Agnieszka                            | Co-Investigator       |
|                                                                         | POL05 - Lodz - Polish<br>Mother's Memorial<br>Hospital (I.C.Z.M.P)                          | Cytryk                           | Katarzyna                            | Local Investigator    |
|                                                                         |                                                                                             | Zawodniak-Szalapska              | Malgorzata                           | Co-Investigator       |
| Spain                                                                   | SPA01 - Cruces<br>University Hospital-<br>UPV/EHU-<br>CIBERDEM/CIBERER,<br>Barakaldo, Spain | Castano                          | Luis                                 | National Investigator |
|                                                                         |                                                                                             | Chueca                           | Maria                                | Co-Investigator       |
|                                                                         |                                                                                             | Gonzalez Frutos                  | Teba                                 | Local Coordinator     |
| SPA02 - Madrid - Hospital<br>Clinico San Carlos                         | Serrano-Ríos                                                                                | Manuel                           | National Investigator                |                       |
|                                                                         | Martínez-Larrad<br>Hawkins                                                                  | María Teresa<br>Federico Gustavo | Local Coordinator<br>Co-Investigator |                       |
| SPA03 - Madrid - Hospital<br>Gregorio Marañon                           | Rodriguez Arnau                                                                             | Dolores                          | Co-Investigator                      |                       |
| Sweden                                                                  | SWE01 - Linköping -<br>University of Linköping                                              | Ludvigsson                       | Johnny                               | National Investigator |
|                                                                         |                                                                                             | Smolinska Konefal                | Malgorzata                           | National Coordinator  |
|                                                                         | SWE02 - Uddevalla -<br>Uddevalla Hospital                                                   | Hanas                            | Ragnar                               | Local Investigator    |
| SWE03 - Göteborg -<br>GothenburgThe Queen<br>Silvia Children's Hospital | Lindblad                                                                                    | Bengt                            | Local Investigator                   |                       |

| <u>Administration/<br/>Country</u> | <u>Study center</u>                                                                 | <u>Last name</u> | <u>First name</u> | <u>Position</u>                                                 |
|------------------------------------|-------------------------------------------------------------------------------------|------------------|-------------------|-----------------------------------------------------------------|
| <b>Sweden</b>                      | <b>SWE05 - Halmstad -<br/>Halmstad Hospital</b>                                     | Nilsson          | Nils-Östen        | Local Investigator                                              |
|                                    | <b>SWE06 - Trollhättan -<br/>Trollhättan Hospital</b>                               | Fors             | Hans              | Local Investigator                                              |
|                                    | <b>SWE07 - Norrköping -<br/>Vrinnevi Hospital</b>                                   | Nordwall         | Maria             | Local Investigator                                              |
|                                    | <b>SWE08 - Borås - Borås<br/>Hospital</b>                                           | Lindh            | Agne              | Local Investigator                                              |
|                                    | <b>SWE09 - Karskrona -<br/>Karlskrona Hospital</b>                                  | Edenwall         | Hans              | Local Investigator                                              |
|                                    | <b>SWE10 - Örebro -<br/>University Hospital</b>                                     | Åman             | Jan               | Local Investigator                                              |
|                                    | <b>SWE11 - Jönköping -<br/>Ryhovs Hospital</b>                                      | Johansson        | Calle             | Local Investigator                                              |
| <b>Switzerland</b>                 | <b>SWT01 - Zürich -<br/>University Children's<br/>Hospital</b>                      | Gadient          | Margrit           | Local Coordinator                                               |
|                                    |                                                                                     | Konrad           | Daniel            | National Investigator                                           |
|                                    |                                                                                     | Schoenle         | Eugen             | National Investigator                                           |
| <b>USA</b>                         | <b>USA01 – Pittsburgh,<br/>Pennsylvania - Children's<br/>Hospital of Pittsburgh</b> | Becker           | Dorothy           | USA National Investigator<br>/ Pittsburgh Local<br>Investigator |
|                                    |                                                                                     | Daftary<br>Klein | Ashi<br>Mary Beth | Co-Investigator<br>Pittsburgh<br>Coordinator                    |
|                                    |                                                                                     | Gilmour          | Carol             | Co-Investigator                                                 |



| <u>Administration/<br/>Country</u>                         | <u>Study center</u>                                                                          | <u>Last name</u> | <u>First name</u>     | <u>Position</u>               |
|------------------------------------------------------------|----------------------------------------------------------------------------------------------|------------------|-----------------------|-------------------------------|
| USA                                                        | USA02 – Seattle, Washington - VA Puget Sound Health Care System and University of Washington | Palmer           | Jerry                 | Local Investigator            |
|                                                            |                                                                                              | Palmer           | Patty                 | Local Investigator            |
|                                                            |                                                                                              | Malone           | Patty                 | Coordinator                   |
|                                                            | USA03 - St. Louis, Missouri - Washington University                                          | Tanner-Blasiar   | Marilyn               | Coordinator                   |
|                                                            |                                                                                              | White            | Neil                  | Local Investigator            |
|                                                            | USA04 - Los Angeles, California - Mattel Children's Hospital of UCLA                         | Devaskar         | Uday                  | Local Investigator            |
| Horowitz                                                   |                                                                                              | Heather          | Coordinator/dietitian |                               |
| Rogers                                                     |                                                                                              | Lisa             | Coordinator/dietitian |                               |
| USA05 – Ponce, Puerto Rico - Ponce School of Medicine      | Colon                                                                                        | Roxana           | Coordinator           |                               |
|                                                            | Frazer                                                                                       | Teresa           | Co-Investigator       |                               |
|                                                            | Torres                                                                                       | Jose             | Local Investigator    |                               |
| USA06 - New York, New York - Naomie Berrie Diabetes Center | Goland                                                                                       | Robin            | Local Investigator    |                               |
|                                                            | Greenberg                                                                                    | Ellen            | Coordinator           |                               |
|                                                            | Schachner                                                                                    | Holly            | Co-Investigator       |                               |
|                                                            | Softness                                                                                     | Barney           | Co-Investigator       |                               |
| Laboratories                                               | HLA-typing Laboratory – University of Turku, Turku – Finland                                 | Ilonen           | Jorma                 | Head of HLA-typing Laboratory |
|                                                            |                                                                                              | Trucco           | Massimo               | Head of HLA-typing Laboratory |
|                                                            | HLA-typing Laboratory – University of Pittsburgh, Pennsylvania - USA                         | Nichol           | Lynn                  | Chief Technician              |

|                                                                                    |                  |                 |                                                |
|------------------------------------------------------------------------------------|------------------|-----------------|------------------------------------------------|
| <b>Cow's Milk Antibody Laboratory – University of Helsinki, Helsinki – Finland</b> | Savilahti        | Erkki           | Head of Cow's Milk Antibody Laboratory         |
| <b>Autoantibody Laboratory – University of Helsinki, Helsinki – Finland</b>        | Härkönen<br>Knip | Taina<br>Mikael | Co-Investigator<br>Head of Antibody Laboratory |
| <b>T-Cell Laboratory – Helsinki, Helsinki – Finland</b>                            | Vaarala          | Outi            | Head of T-cell Laboratory                      |
|                                                                                    | Luopajarvi       | Kristiina       | Co-Investigator                                |
| <b>T-Cell Laboratory – Hospital for Sick Children, Toronto, Ontario - Canada</b>   | Dosch            | Hans-Michael    | Head of T-Cell Laboratory                      |
